# Supplementary material for: The Contribution of Viral Genotype to Plasma Viral Set-Point in HIV Infection
Source: PubMed Central journal article supplement (PMC4006911; doi:10.1371/journal.ppat.1004112), 2014-05-01
Supplement: ppat.1004112.s003.pdf [file ppat.1004112.s003.pdf]

Supplementary Information Table1 – Mean Fixed Effect Estimates of spVL Influence

| <b>Effect</b>                               | <b>Units</b>                 | <b>Estimate</b> | <b>Standard Error</b> |
|---------------------------------------------|------------------------------|-----------------|-----------------------|
| Intercept                                   |                              | 4.508           | 0.117                 |
| Age at viral load test*                     | per year                     | 8.48E-03        | 1.13E-03              |
| Year of HIV Diagnosis*                      | per year                     | -4.00E-03       | 3.46E-03              |
| Time from HIV Diagnosis to viral load test* | per day                      | -6.18E-05       | 1.49E-05              |
| Sex                                         | Male                         | 0               | 0                     |
|                                             | Female                       | -0.200          | 0.044                 |
| Ethnicity                                   | White                        | 0               | 0                     |
|                                             | Asian/Oriental               | -0.038          | 0.076                 |
|                                             | Black-other                  | -0.127          | 0.073                 |
|                                             | Indian/Pakistani/Bangladeshi | -0.136          | 0.093                 |
|                                             | Other/Mixed                  | -0.142          | 0.039                 |
|                                             | Black-Caribbean              | -0.165          | 0.053                 |
|                                             | Not known                    | -0.171          | 0.079                 |
|                                             | Black-African                | -0.260          | 0.075                 |
|                                             | Other                        | -0.267          | 0.161                 |

\*Values were means-adjusted before analysis
