# Supplementary material for: The Contribution of Viral Genotype to Plasma Viral Set-Point in HIV Infection
Source: PubMed Central journal article supplement (PMC4006911; doi:10.1371/journal.ppat.1004112), 2014-05-01
Supplement: ppat.1004112.s004.pdf [file ppat.1004112.s004.pdf]

Supplementary Information Table 2 – Details of Sequences Removed During Data Cleaning

|                                                                                                                                                                            |       |
|----------------------------------------------------------------------------------------------------------------------------------------------------------------------------|-------|
| Number of subtype B sequences with at least 1 viral load measure before ART                                                                                                | 8,700 |
| 1 VL measure, which is $\geq 1,000,000$ where a CD4 is available within 1 month and is over 500 (could be in acute stage)                                                  | -12   |
| 1 VL measure, which is 500,000 or 750,000 (measurement limit, treated as over 1,000,000) where a CD4 is available within 1 month and is over 500 (could be in acute stage) | -21   |
| 1 VL measure, which is $\leq 50$ where a CD4 is available within 1 month and is over 200 (could be on ART)                                                                 | -26   |
| 1 VL measure, which is 400 (measurement limit, treated as being 50) where a CD4 is available within 1 month and is over 200 (could be on ART)                              | -3    |
| VL measures over 1,000,000 (or 500,000 or 750,000, treated as 1,000,000) that fall below 1,000 in 93 days (could have started ART)                                         | -8    |
| 1 VL measure of 1, rejected as potential database error                                                                                                                    | -1    |
| Missing 200bp in RT                                                                                                                                                        | -7    |
| Identical sequences removed                                                                                                                                                | -119  |
| Missing RT or protease                                                                                                                                                     | -20   |
| Final number of records                                                                                                                                                    | 8,483 |
